# Supplementary material for: Ethylenediamine modified carbon nanospheres from biomass for selective membrane filtration
Source: Royal Society of Chemistry journal article supplement (doi:10.1039/d5na00661a), 2025-01-01
Supplement: d5na00661a1.pdf [file d5na00661a1.pdf]

## Ethylenediamine modified carbon nanospheres from Biomass for Selective Membrane Filtration

B G Maya Patel<sup>1,2</sup>, Sk Safikul Islam<sup>4</sup>, Samir Mondal<sup>2</sup>, Suryasarathi Bose<sup>3</sup>, Gurumurthy Hegde<sup>1,2</sup>

**Table S1.** Summary of abbreviations of CNS variants and membrane codes

| Abbreviation | Description                                       |
|--------------|---------------------------------------------------|
| CNS          | Carbon nanospheres                                |
| RH-CNS       | Rice husk derived carbon nanospheres              |
| O-CNS        | Acid functionalized carbon nanospheres            |
| E-CNS        | Ethylenediamine functionalized carbon nanospheres |
| PVDF-0       | Pristine PVDF (no E-CNS) membrane                 |
| PVDF-1       | PVDF membrane with 0.1 wt% E-CNS                  |
| PVDF-2       | PVDF membrane with 0.3 wt% E-CNS                  |
| PVDF-3       | PVDF membrane with 0.5 wt% E-CNS                  |
| PVDF-4       | PVDF membrane with 0.7 wt% E-CNS                  |

**Table S2.** Specifications for organic dyes and antibiotics

| Dye        | Molecular weight (g/mol) | Structure                                                                           | Wavelength ( $\lambda_{\text{max}}$ ) |
|------------|--------------------------|-------------------------------------------------------------------------------------|---------------------------------------|
| Methyl Red | 269.3                    | 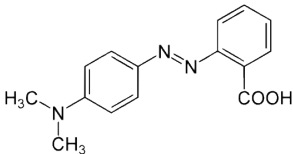 | 520 nm                                |

|              |        |                                                                                   |                |
|--------------|--------|-----------------------------------------------------------------------------------|----------------|
| Rhodamine B  | 479.02 | 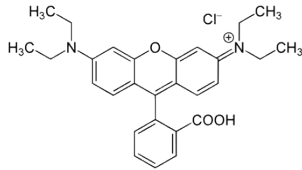 | 550 nm         |
| Amoxicillin  | 365.4  |  | 270 nm         |
| Tetracycline | 444.43 |  | 276 and 357 nm |

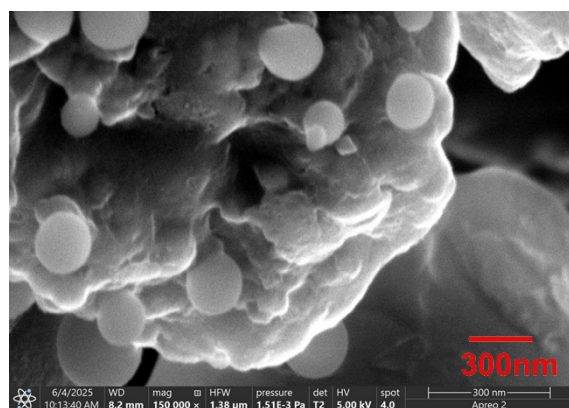

**Fig S1.** FESEM images of RH-CNS

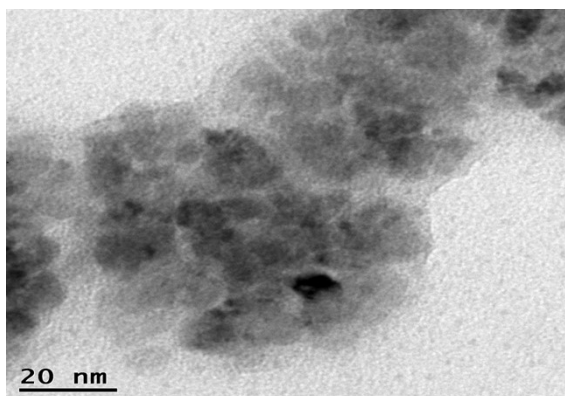

**Fig S2.** TEM image of E-CNS

a) PVDF-1 membrane with (0.1 wt% E-CNS content)

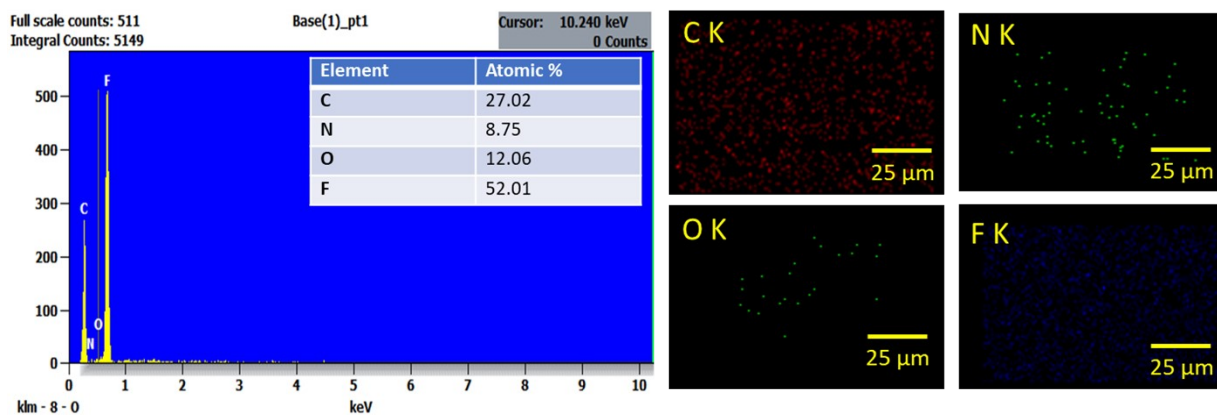

b) PVDF-2 membrane with (0.3 wt% E-CNS content)

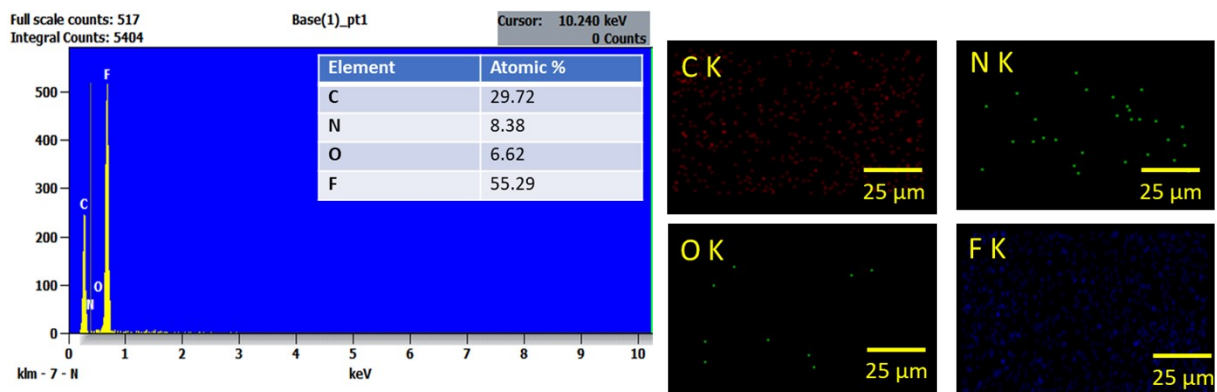

c) PVDF-3 membrane with (0.5 wt% E-CNS content)

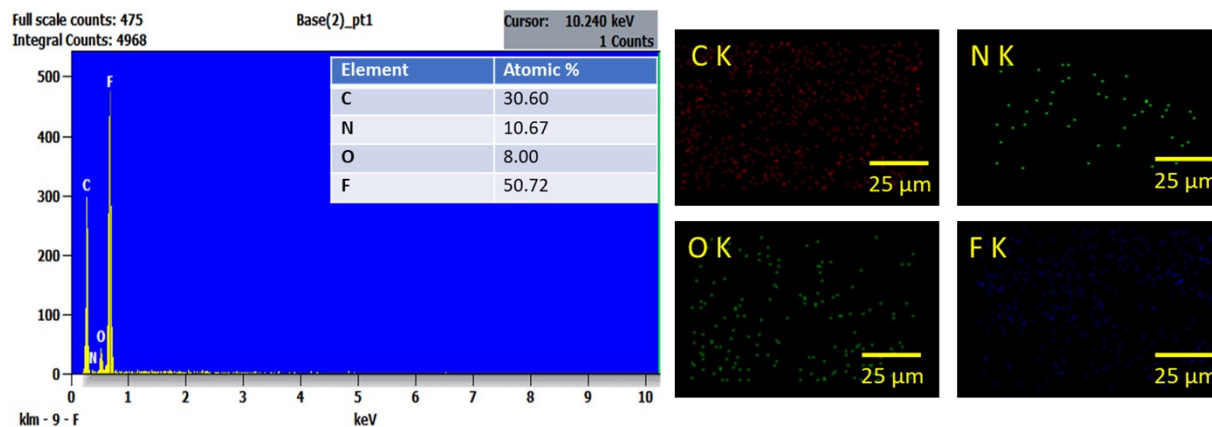

d) PVDF-4 membrane with (0.7 wt% E-CNS content)

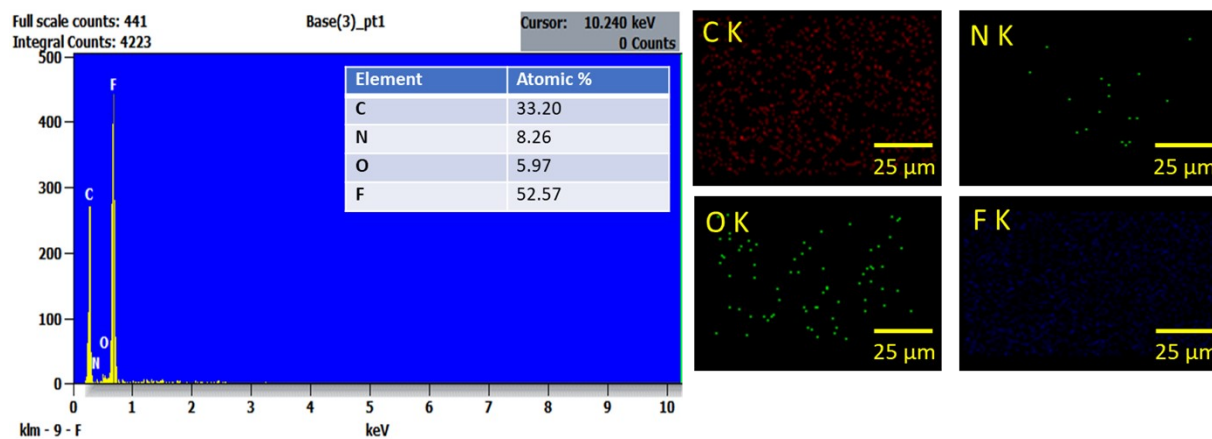

**Fig S3.** EDS mapping on PVDF/E-CNS membranes

**Table**  
PVDF

| <b>Membrane designation</b> | <b>Porosity <math>\epsilon</math>, (%)</b> |
|-----------------------------|--------------------------------------------|
| M-0                         | 62.41                                      |
| M-1                         | 72.64                                      |
| M-2                         | 78.89                                      |
| M-3                         | 73.75                                      |
| M-4                         | 71.12                                      |

**S3.** Porosity of pristine  
and PVDF/E-CNS  
composite membranes

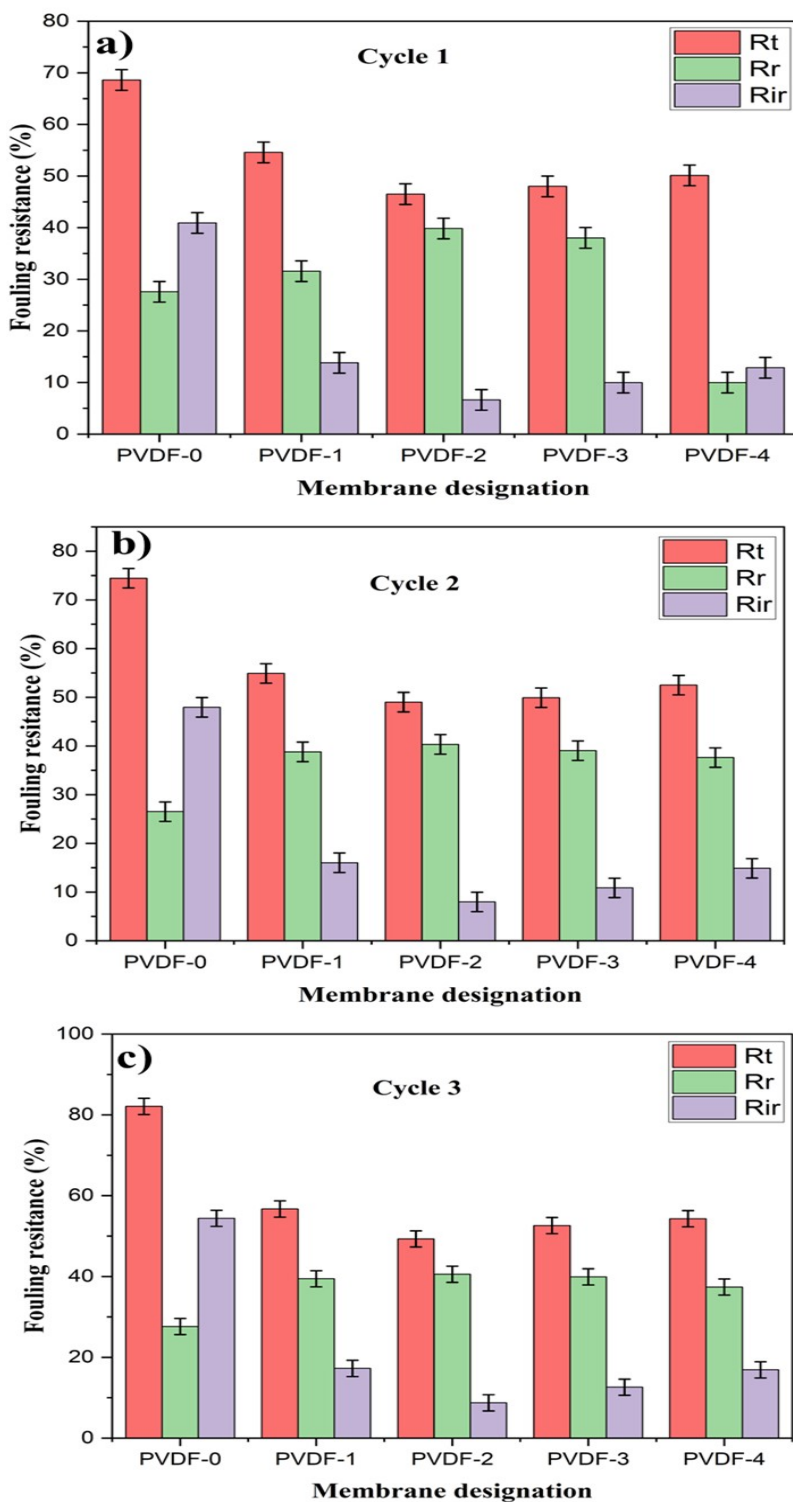

**Fig S4.** Rt, Rr, Rir of pristine PVDF and PVDF/E-CNS composite membranes (a) Cycle 1, (b) Cycle 2, (c) Cycle 3

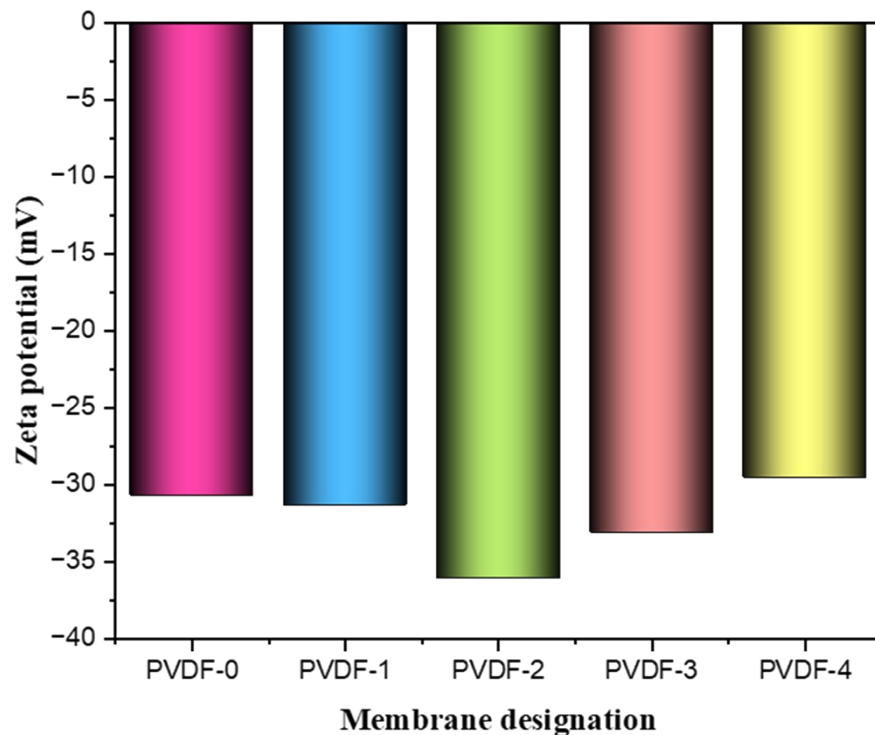

**Fig S5.** Zeta potential values of pristine PVDF and PVDF/E-CNS composite membranes

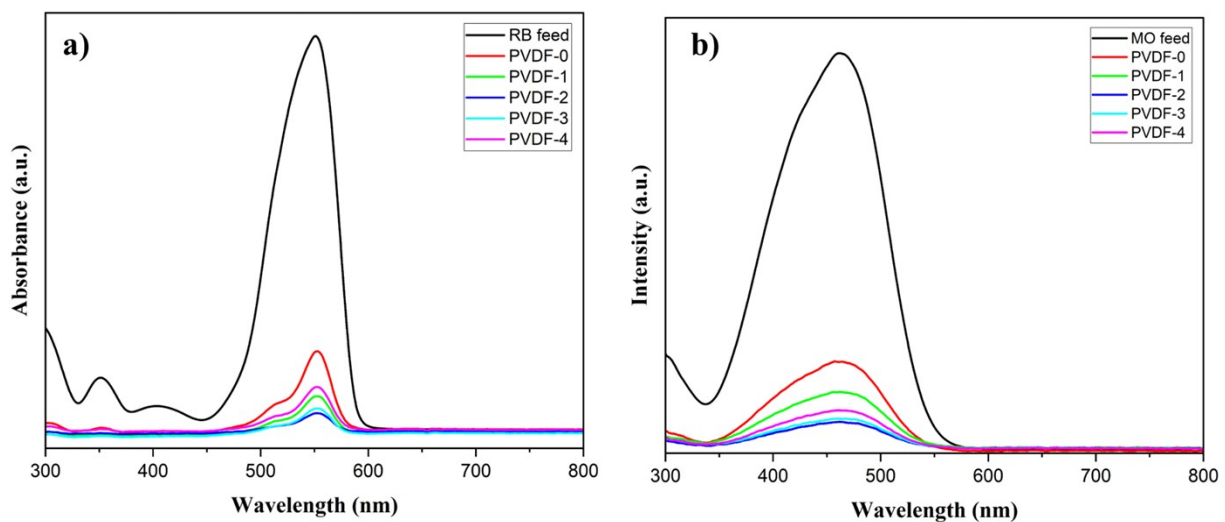

**Fig S6.** UV-Vis spectra of (a) RB feed and permeate solutions, (b) MO feed and permeate solutions

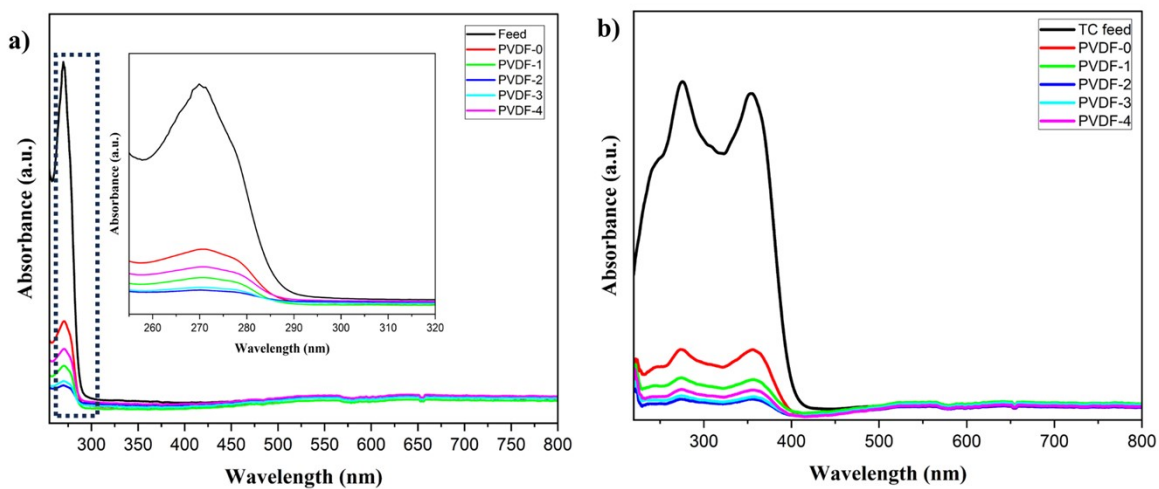

**Fig S7.** UV-Vis spectra of (a) AM feed and permeate solutions, (b) TC feed and permeate solutions
